# Supplementary material
Source: publisher site journal article supplement (https://www.spandidos-publications.com/2976/downloadSupplementary)
Supplement: Supplementary file 1 [file downloadSupplementary]

## Sheet: Sheet1
List of DETF- miRNA-target regulatory pairs
Souce nodes	target node
FOSL1	hsa-miR-221
FOSL1	hsa-miR-222
FOSL1	hsa-miR-134
SNAI2	hsa-miR-221
SNAI2	hsa-miR-222
SNAI2	hsa-miR-200a
SNAI2	hsa-miR-141
SNAI2	hsa-miR-145
SNAI2	hsa-miR-200c
ZBTB16	hsa-miR-221
ZBTB16	hsa-miR-222
HMGA1	hsa-miR-222
CEBPB	hsa-miR-20a
CEBPB	hsa-miR-18a
CEBPB	hsa-miR-223
CEBPB	hsa-miR-143
CEBPB	hsa-miR-181c
CEBPB	hsa-miR-145
E2F7	hsa-miR-16
E2F7	hsa-miR-25
E2F7	hsa-miR-7
E2F7	hsa-miR-15a
IL1B	hsa-miR-21
FOXM1	hsa-miR-200a
FOXM1	hsa-miR-141
FOXM1	hsa-miR-200c
EPAS1	hsa-miR-181c
EPAS1	hsa-miR-29c
FOXO1	hsa-miR-145
hsa-miR-221	CHSY1
hsa-miR-222	CHSY1
hsa-miR-134	SLC14A1
hsa-miR-200a	THBS1
hsa-miR-141	THBS1
hsa-miR-145	CRISPLD2
hsa-miR-200c	CYP1B1
hsa-miR-20a	SLC40A1
hsa-miR-20a	CROT
hsa-miR-20a	CTSK
hsa-miR-20a	PBK
hsa-miR-20a	CYBRD1
hsa-miR-18a	ALCAM
hsa-miR-223	CENPN
hsa-miR-143	IGFBP5
hsa-miR-181c	DEPDC6
hsa-miR-181c	GLS
hsa-miR-181c	TGFBI
hsa-miR-16	PAPPA
hsa-miR-25	TEX2
hsa-miR-25	CREB3L2
hsa-miR-25	STAT2
hsa-miR-7	CTSK
hsa-miR-15a	KIF23
hsa-miR-15a	CYP2S1
hsa-miR-21	LUM
hsa-miR-29c	PPIC
